# Supplementary material for: Malnutrition: Percentage and Association with Prognosis in Patients Hospitalized for Coronavirus Disease 2019
Source: PubMed Central journal article supplement (PMC7761464; doi:10.3390/nu12123679), 2020-11-28
Supplement: nutrients-12-03679-s001.pdf [file nutrients-12-03679-s001.pdf]

# Prevalence of malnutrition and its consequences on prognosis in patients hospitalized for SARS-Cov2 virus infection

**First Author: Lucie Allard**

**Online supplementary material**

**Supplementary figure 1: Flow Chart**

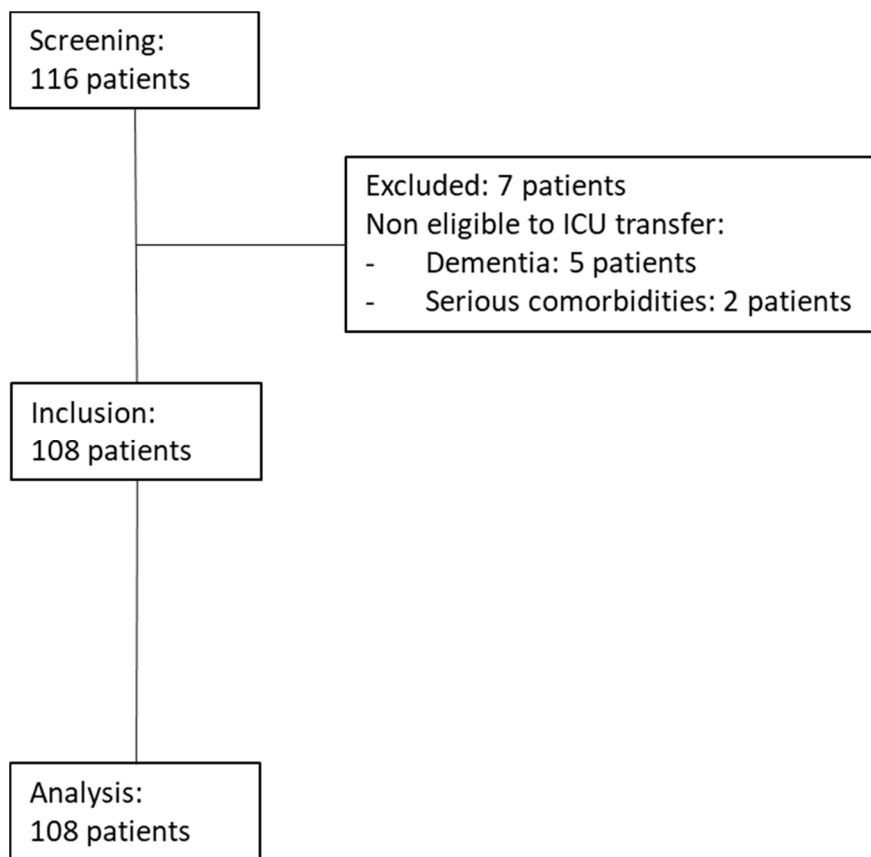

ICU: intensive care unit

All patients included were analyzed

Supplementary Figure 2: maximal nasal oxygen flow according to clinical malnutrition

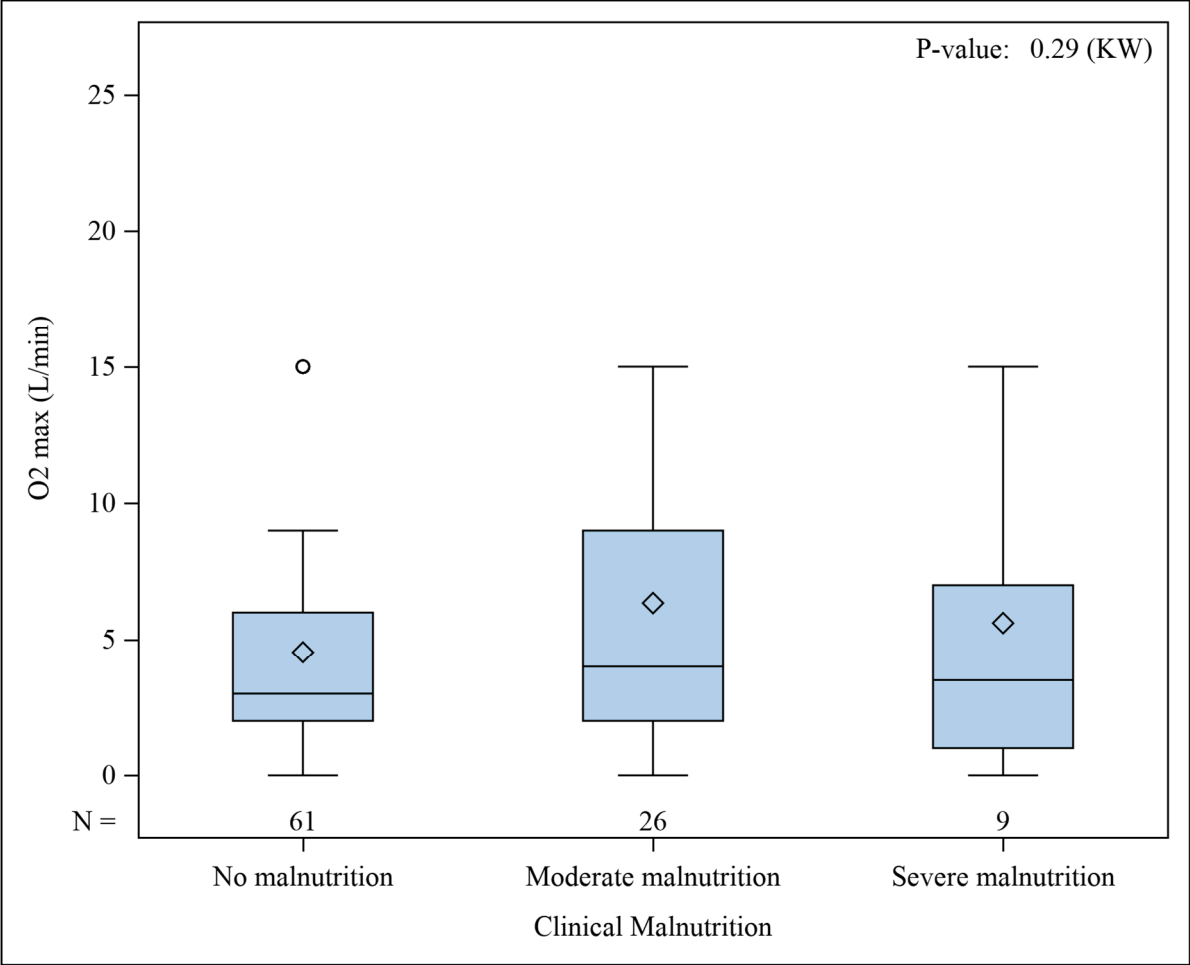

Clinical malnutrition: body mass index (BMI) < 18.5 kg/m<sup>2</sup> (or < 21 kg/m<sup>2</sup> if age was ≥ 70 years) or weight loss ≥ 5% in one month, and/or weight loss ≥ 10% in six months

Severe clinical malnutrition: BMI ≤ 17.0 kg/m<sup>2</sup> (or ≤ 18.5 kg/m<sup>2</sup> if age was ≥ 70 years) and/or weight loss > 10% in 1 month and/or > 15% in 6 months

Supplementary Figure 3: maximal nasal oxygen flow according to weight loss in one month

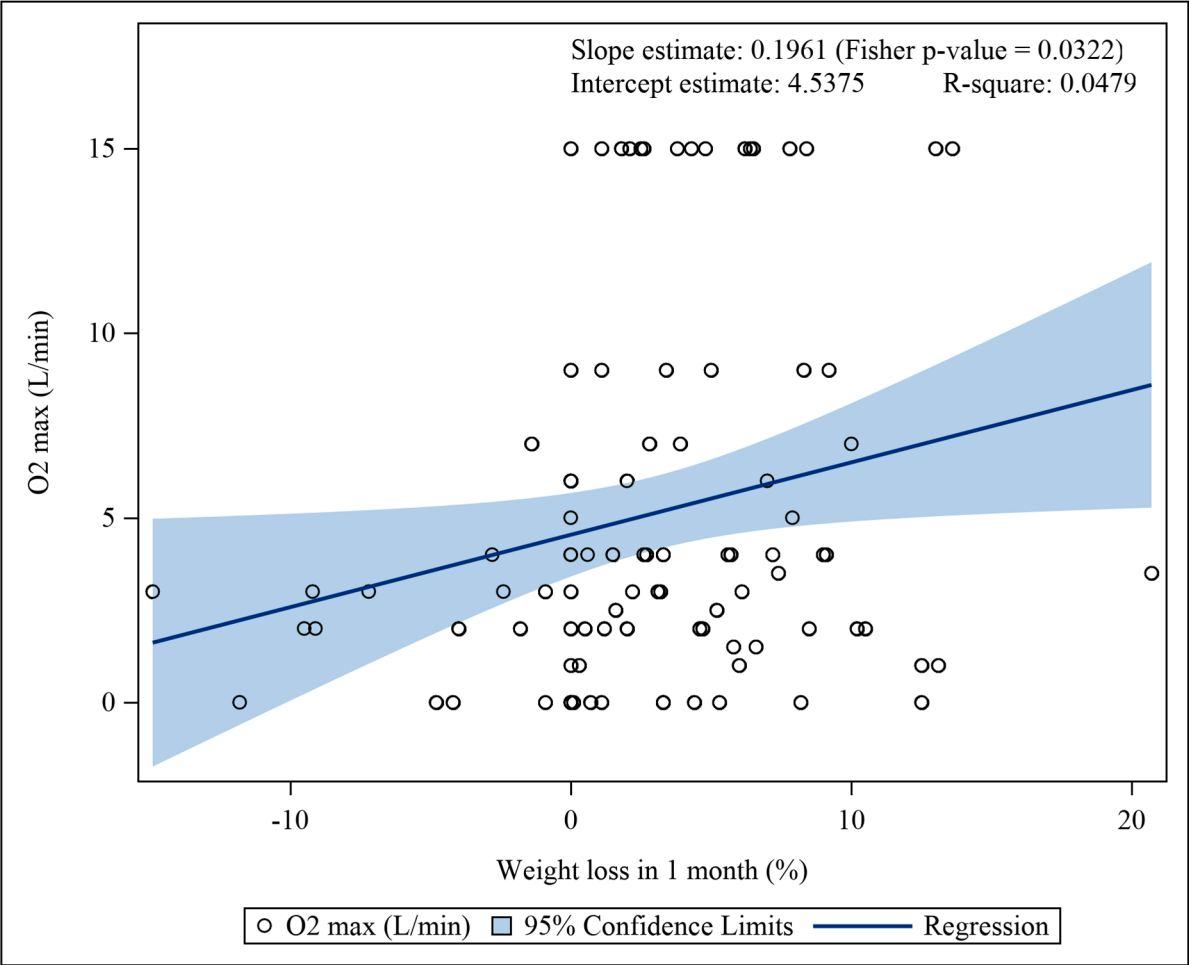

Supplementary Figure 4: maximal nasal oxygen according to nutritional risk

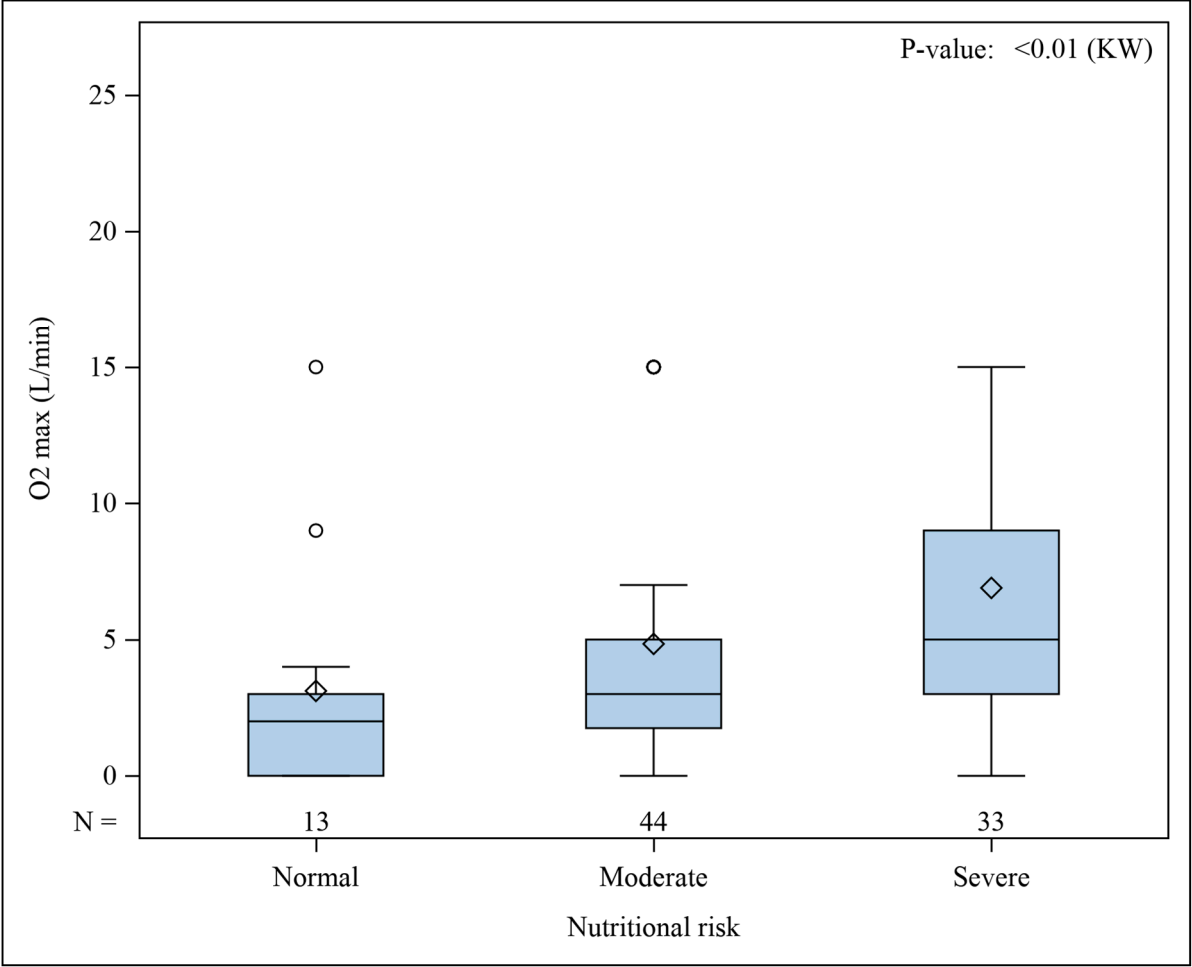

Nutritional risk index (NRI):  $1.519 \times \text{albumin (g/l)} + 0.417 \times (\text{measured weight/ usual weight}) \times 100$ . Nutritional risk status is defined according to NRI level: no nutritional risk (NRI  $\geq 97.5\%$ ), moderate nutritional risk (NRI  $83.5-97.4\%$ ) and severe nutritional risk (NRI  $< 83.5\%$ ).

Supplementary Figure 5: maximal nasal oxygen by nutritional risk index

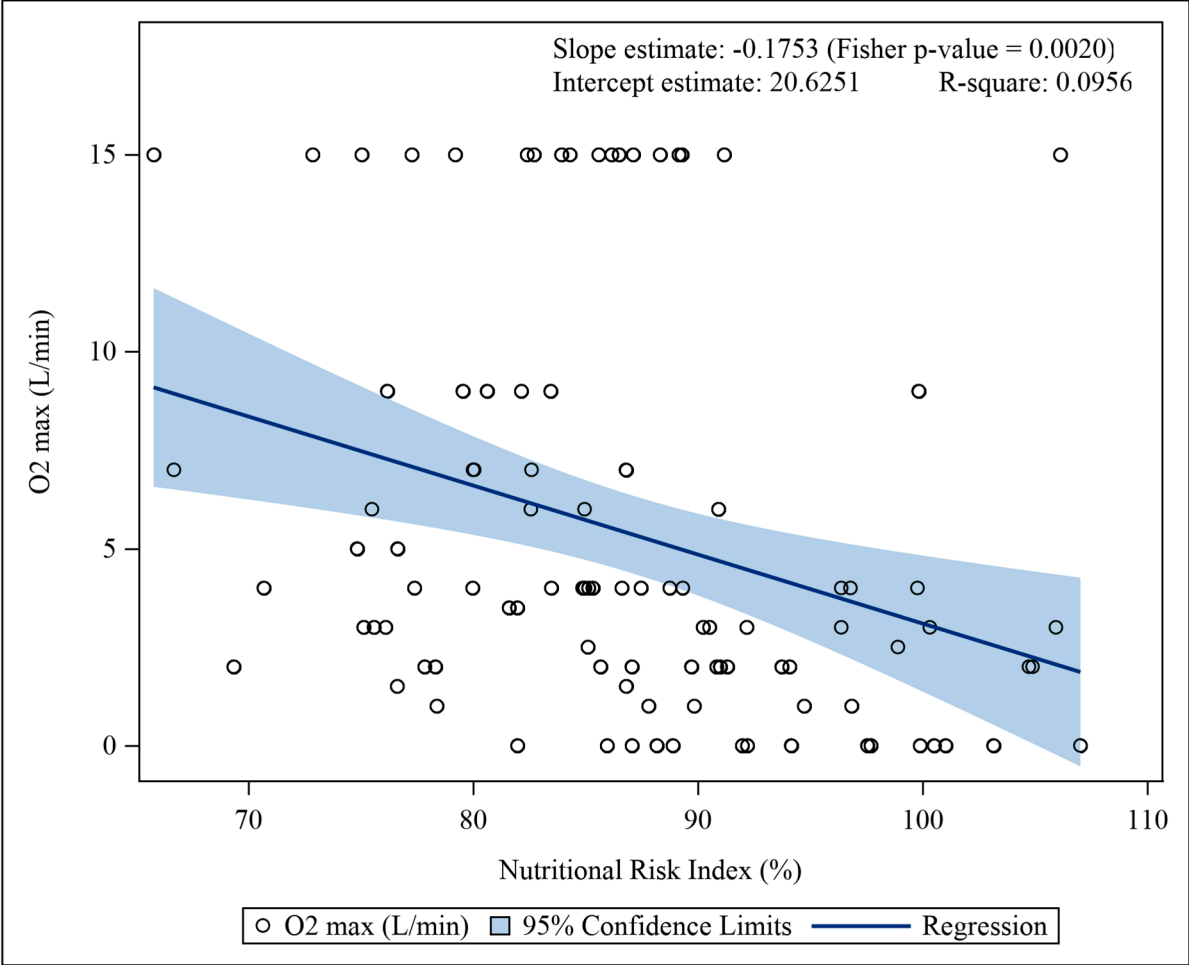

Nutritional risk index is calculated as  $1.519 \times \text{albumin (g/l)} + 0.417 \times (\text{measured weight} / \text{usual weight}) \times 100$ .

**Supplementary Table 1: Correlation between secondary outcomes and severe COVID-19**

|                                       | N   | Total      | Non severe COVID-19 | Severe COVID-19 | p     |
|---------------------------------------|-----|------------|---------------------|-----------------|-------|
|                                       |     | n = 108    | n = 74              | n = 34          |       |
| Maximum flow of nasal O2 (L/min)      | 108 | 4.8 ± 5.0  | 2.1 ± 1.6           | 10.7 ± 4.9      | <0.01 |
| Length of stay (days)                 | 98  | 10.5 ± 7.2 | 8.6 ± 5.9           | 15.7 ± 7.9      | <0.01 |
| Non invasive ventilation              | 108 | 15 (13.9)  | 0 (0.0)             | 15 (44.1)       | <0.01 |
| Transfer into the intensive care unit | 108 | 14 (13.0)  | 3 (4.1)             | 11 (32.4)       | <0.01 |
| Mortality                             | 108 | 5 (4.6)    | 0 (0.0)             | 5 (14.7)        | <0.01 |

Continuous variables are expressed as mean ± standard deviation. Categorical variables are expressed as number of patient (percentage). N: number of available data

COVID-19: Coronavirus disease 2019. Severe COVID-19 was defined as a need for nasal oxygen flow at or above six liters per minute.

**Supplementary Table 2: Nutritional biomarkers and care according to nutritional status**

|                                 | n   | No clinical malnutrition | Clinical malnutrition* | p    | n  | No nutritional risk | Nutritional risk** | p     |
|---------------------------------|-----|--------------------------|------------------------|------|----|---------------------|--------------------|-------|
|                                 | 108 | n=66                     | n=42                   |      | 98 | n=15                | n=83               |       |
| <b>Nutritional biomarkers</b>   |     |                          |                        |      |    |                     |                    |       |
| Albumin (g/l)                   | 98  | 31.3 ± 5.8               | 30.3 ± 5.1             | 0.45 | 98 | 39.6 ± 2.1          | 29.3 ± 4.4         | <0.01 |
| Prealbumin (g/l)                | 89  | 0.16 ± 0.07              | 0.13 ± 0.06            | 0.11 | 87 | 0.14 ± 0.06         | 0.23 ± 0.08        | <0.01 |
| Protid (g/l)                    | 108 | 68.2 ± 10.3              | 65.6 ± 6.9             | 0.17 | 98 | 75.3 ± 5.5          | 65.9 ± 9.1         | <0.01 |
| Zinc (mg/l)                     | 47  | 0.7 ± 0.2                | 0.7 ± 0.2              | 0.80 | 44 | 0.7 ± 0.2           | 0.7 ± 0.2          | 0.73  |
| Selenium (µg/l)                 | 53  | 85.8 ± 18.7              | 77.7 ± 18.1            | 0.15 | 50 | 83.2 ± 7.5          | 81.8 ± 18.2        | 0.85  |
| Calcium (mmol/l)                | 100 | 2.2 ± 0.1                | 2.1 ± 0.1              | 0.03 | 92 | 2.4 ± 0.1           | 2.1 ± 0.1          | <0.01 |
| Phosphore (mmol/l)              | 100 | 1.1 ± 0.2                | 1.0 ± 0.2              | 0.04 | 92 | 1.1 ± 0.3           | 1.0 ± 0.2          | 0.18  |
| Magnesium (mmol/l)              | 95  | 0.8 ± 0.1                | 0.8 ± 0.1              | 0.28 | 88 | 0.8 ± 0.1           | 0.8 ± 0.1          | 0.80  |
| 25-OH vitamin D (ng/ml)         | 67  | 14.3 ± 11.5              | 17.4 ± 14.4            | 0.23 | 64 | 11.4 ± 3.9          | 15.9 ± 13.1        | 0.88  |
| Fasting plasma glucose (mmol/l) | 104 | 6.8 ± 2.9                | 7.6 ± 3.0              | 0.08 | 95 | 6.9 ± 2.3           | 7.2 ± 3.1          | 0.99  |
| <b>Nutritional care</b>         |     |                          |                        |      |    |                     |                    |       |
| Oral supplements                | 108 | 38 (57.6)                | 31 (73.8)              | 0.09 | 98 | 3 (20.0)            | 62 (74.7)          | <0.01 |
| Enteral nutrition               | 108 | 0 (0.0)                  | 3 (7.1)                | 0.06 | 98 | 0 (0.0)             | 3 (3.6)            | 1.00  |
| Vitamin supplementation         | 107 | 22 (33.8)                | 15 (35.7)              | 0.84 | 97 | 4 (26.7)            | 32 (39.0)          | 0.36  |

\* Clinical malnutrition: body mass index (BMI) < 18.5 kg/m<sup>2</sup> (or < 21 kg/m<sup>2</sup> if age was ≥ 70 years) or weight loss ≥ 5% in one month, and/or weight loss ≥ 10% in six months

\*\* Nutritional risk is defined as a Nutritional Risk Index (NRI) < 97.5.  $NRI = 1.519 \times \text{albumin (g/l)} + 0.417 \times (\text{measured weight/ usual weight}) \times 100$ .

**Supplementary Table 3: Multivariable analysis explaining COVID-19 severity**

|                                                | <b>Odds Ratios [95% confidence interval]</b> | <b>p</b> |
|------------------------------------------------|----------------------------------------------|----------|
| Age (by 10 years)                              | 1.687 [1.076- 2.647]                         | 0.023    |
| PCR for SARS-CoV-2 (ref = positive)            | 4.852 [1.083- 21.737]                        | 0.039    |
| Ferritin (by 1000 µg/l)                        | 3.149 [1.525- 6.501]                         | 0.002    |
| Low body mass index* (ref = No)                | 0.847 [0.056-12.864]                         | 0.90     |
| Nutritional Risk Index (by 10 units)           | 0.650 [0.318-1.329]                          | 0.24     |
|                                                |                                              |          |
|                                                | <b>Odds Ratios [95% confidence interval]</b> | <b>p</b> |
| Age (by 10 units)                              | 1.687 [1.086 ; 2.621]                        | 0.0199   |
| PCR for SARS-CoV-2 (ref = No)                  | 4.766 [1.064 ; 21.353]                       | 0.0413   |
| Ferritin (by 1000 units)                       | 3.135 [1.517 ; 6.477]                        | 0.0020   |
| BMI (by 1 unit)                                | 1.008 [0.917 ; 1.109]                        | 0.8632   |
| Nutritional Risk Index (by 10 units)           | 0.653 [0.324 ; 1.315]                        | 0.2329   |
|                                                |                                              |          |
|                                                | <b>Odds Ratios [95% confidence interval]</b> | <b>p</b> |
| Age 51-60 y.o. vs <= 50 y.o.                   | 2.644 [0.310 ; 22.538]                       | 0.1358   |
| Age 61-75 y.o. vs <= 50 y.o.                   | 6.754 [1.164 ; 39.178]                       | 0.1358   |
| Age > 75 y.o. vs <= 50 y.o.                    | 8.310 [1.014 ; 68.098]                       | 0.1358   |
| PCR COVID (ref = No)                           | 7.775 [1.597 ; 37.855]                       | 0.0111   |
| Ferritin 301-600 vs <= 300                     | 1.219 [0.090 ; 16.568]                       | 0.0015   |
| Ferritin 601-1000 y.o. vs <= 300               | 19.965 [3.053 ; 130.550]                     | 0.0015   |
| Ferritin >1000 vs <= 300                       | 20.932 [3.121 ; 140.387]                     | 0.0015   |
| Low BMI (ref = No)                             | 3.797 [0.126 ; 114.259]                      | 0.4424   |
| Nutritional Risk Index Moderate (ref = normal) | 0.740 [0.086 ; 6.357]                        | 0.6734   |
| Nutritional Risk Index Severe (ref = normal)   | 1.327 [0.151 ; 11.658]                       | 0.6734   |

\*A low body mass index was defined as  $\leq 18.5 \text{ kg/m}^2$  (or  $\leq 21 \text{ kg/m}^2$  if age was  $\geq 70$  years).

Ref: reference; PCR: polymerase chain reaction

Logistic regression was used for multivariable analysis based on models including the factors (considered as continuous or non continuous) that were associated with COVID-19 severity with a p value  $\leq .05$  in univariate analyses and considering unrelated factors. Therefore, we considered (i) Sars Cov2 PCR status but not initial ambient air saturation nor respiratory rate at admission, (ii) ferritin (n=95) rather than orosomucoid (n=52), and (iii) NRI and not albumin and weight loss in one month which are part of its definition. We did not include prealbumin nor plasma proteins which were highly related to NRI; neither Zinc level (n=47).



**Supplementary Table 4: Secondary outcomes according to nutritional status**

|                                      | <b>n</b> | <b>No clinical malnutrition</b> | <b>Clinical malnutrition*</b> | <b>p</b> | <b>n</b> | <b>No nutritional risk</b> | <b>Nutritional risk**</b> | <b>p</b> |
|--------------------------------------|----------|---------------------------------|-------------------------------|----------|----------|----------------------------|---------------------------|----------|
|                                      | 108      | n=66                            | n=42                          |          | 98       | n=15                       | n=83                      |          |
| Maximum flow of nasal oxygen (L/min) | 108      | 4.5 ±4.8                        | 6.0 ±5.3                      | 0.12     | 98       | 2.7 ±4.2                   | 5.8 ±5.2                  | <0.01    |
| Length of stay (days)                | 98       | 10.8 ±7.2                       | 10.0 ±7.2                     | 0.59     | 98       | 7.9 ±4.2                   | 11.0 ±7.2                 | 0.17     |
| Noninvasive ventilation              | 108      | 8 (12.1)                        | 7 (16.7)                      | 0.07     | 98       | 1 (6.7)                    | 14 (16.9)                 | 0.45     |
| Transfer into intensive care unit    | 108      | 9 (13.6)                        | 5 (11.9)                      | 0.79     | 98       | 1 (6.7)                    | 13 (15.7)                 | 0.69     |
| Mortality                            | 108      | 1 (1.5)                         | 4 (9.5)                       | 0.07     | 98       | 0 (0.0)                    | 5 (6.0)                   | 1.00     |

Continuous variables are expressed as mean ± standard deviation. Categorical variables are expressed as number of patient (percentage). N: number of available data

\* Malnutrition: body mass index (BMI) < 18.5 kg/m<sup>2</sup> (or < 21 kg/m<sup>2</sup> if age was ≥ 70 years) or weight loss ≥ 5% in one month, and/or weight loss ≥ 10% in six months

\*\* Nutritional risk is defined as a Nutritional Risk Index (NRI) < 97.5.  $NRI = 1.519 \times \text{albumin (g/l)} + 0.417 \times (\text{measured weight/ usual weight}) \times 100$ .
